# Supplementary material
Source: PubMed Central journal article supplement (PMC3129164)
Supplement: supp_M110.214254_jbc.M110.214254-1.pdf [file supp_M110.214254_jbc.M110.214254-1.pdf]

## SUPPLEMENTAL DATA

Fig. S1. Circular dichroism (CD) analysis of wild-type and mutant LLT1 proteins. CD spectra were recorded on a JASCO model J-805 CD spectrometer. Far-UV CD measurements were performed with 20  $\mu$ M of each protein in HBS-EP buffer, using a 1 mm cell and a bandwidth of 1 nm. Spectra were accumulated four times.

Fig. S2. Equilibrium binding analysis of LLT1s to immobilized CD161. Wild-type LLT1 (A, red line), C163S LLT1 (B, green line), and H176C LLT1 (C, blue line) were injected at the indicated concentrations through flow cells with CD161. Black lines show the responses to the control protein (BSA).

Fig. S3. Amino acid sequence alignment of the CTLDs of CD161 with LLT1, NKp65, NKp80, PILAR, AICL, mDectin-1, hCD69, hKLRG1, hNKG2A, hCD94, and mLy49A. Red lines indicate putative binding regions revealed in this study. Red dashed lines indicate the ligand binding regions of other KLR family members. Magenta triangle and asterisk indicate the pair of residues that showed detrimental effects when mutated independently, but restored the binding when mutated simultaneously.

Fig. S4. SPR measurements of monoclonal antibody (mAb) B199.2 binding to CD161 proteins. MAb B199.2 was injected (solid bar) over the immobilized CD161 proteins at a flow rate of 5  $\mu$ l/min. The black line shows the response to the control protein (BSA).

Fig. S5. The model structure of the complex between CD161 dimer (green) and LLT1 dimer (dark blue), with the same coloring as in Figs. 3C and 4B.



A

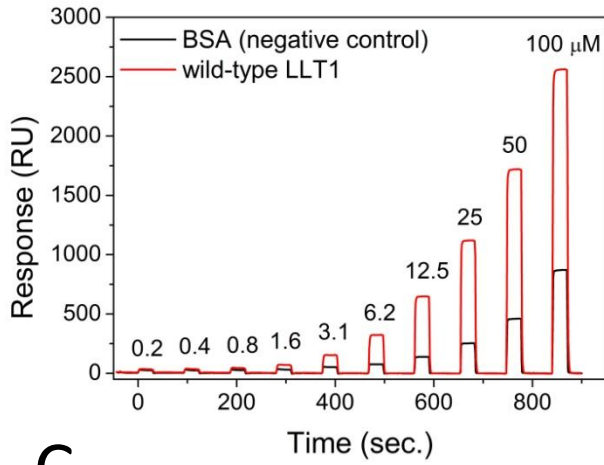

B

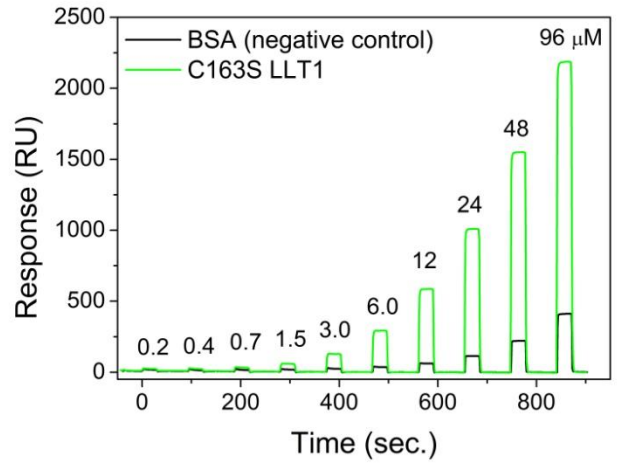

C

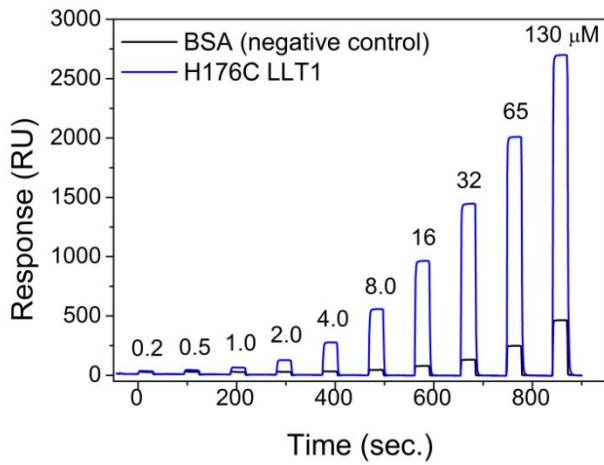

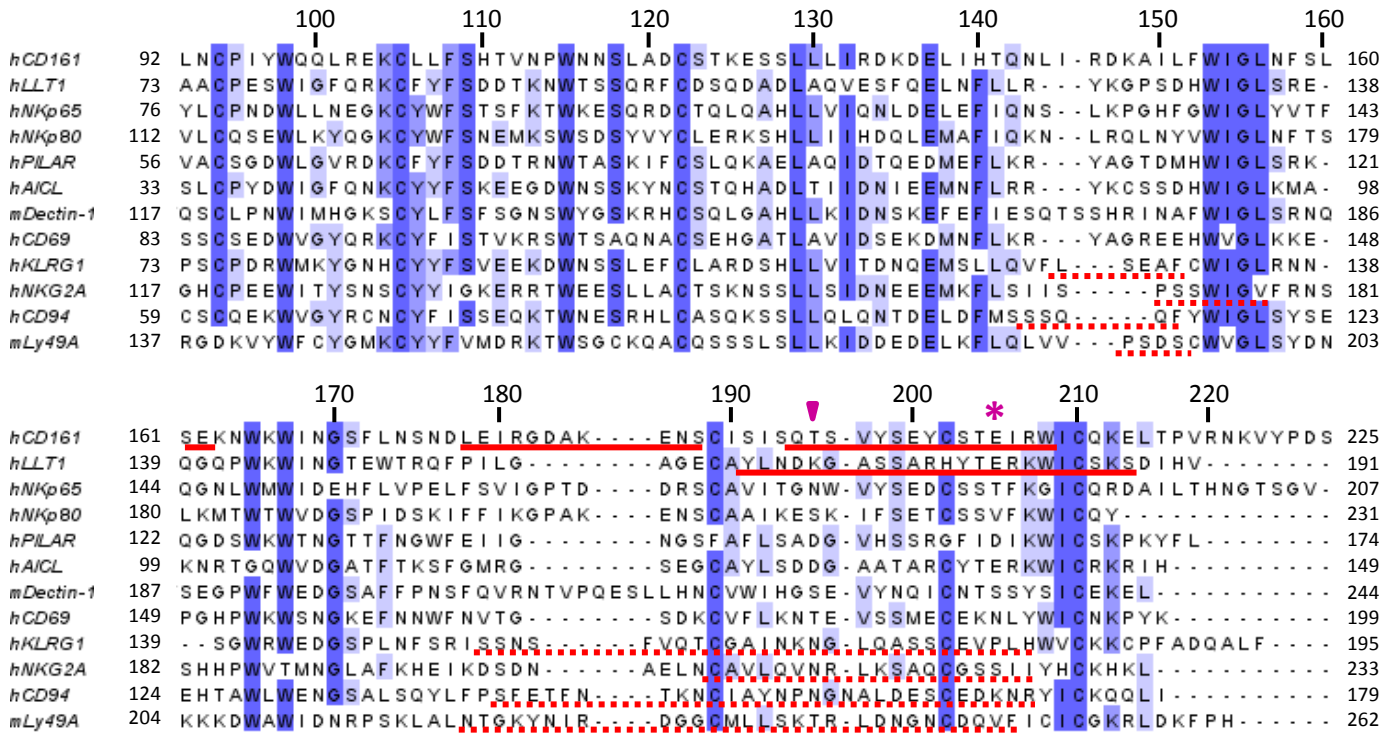

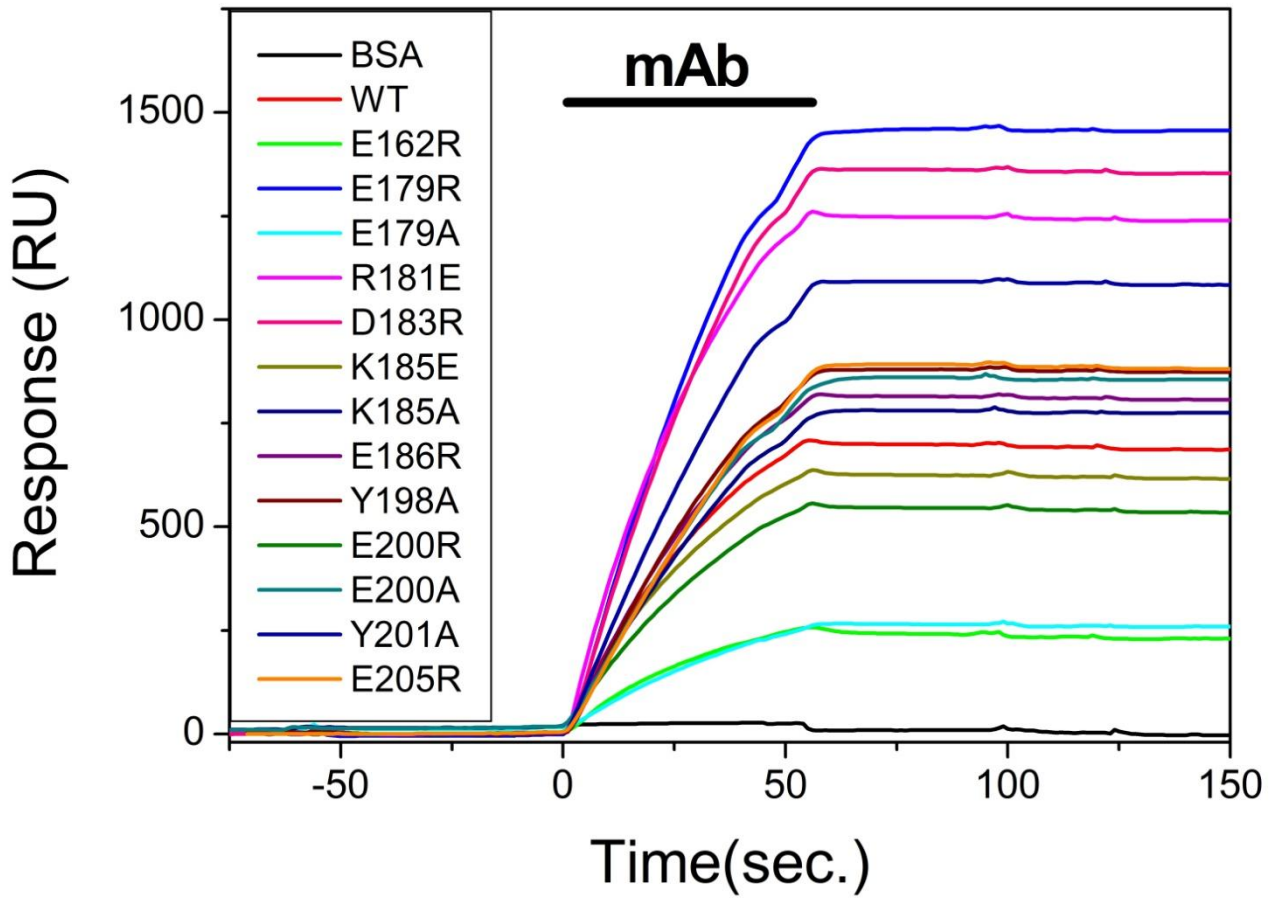

**LLT1**

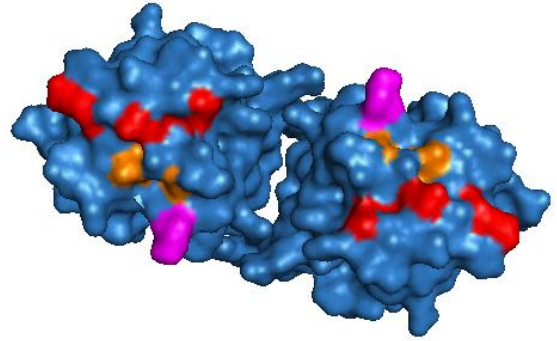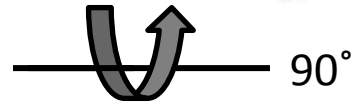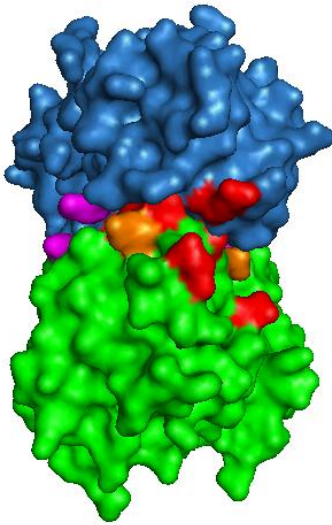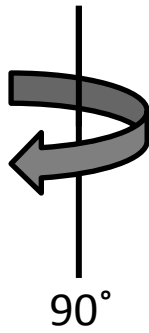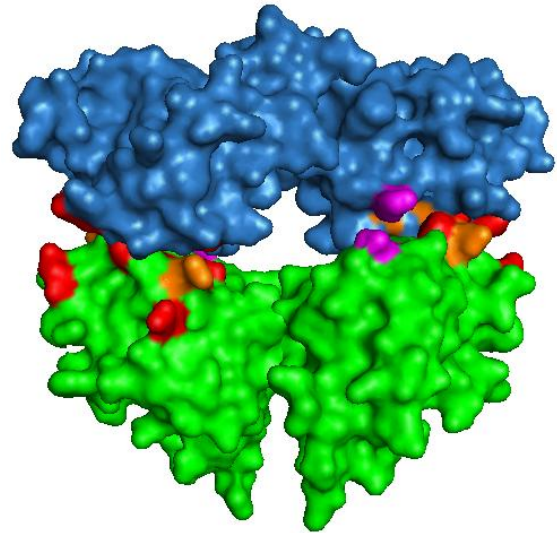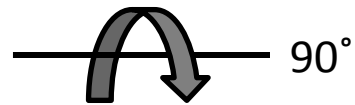

**CD161**

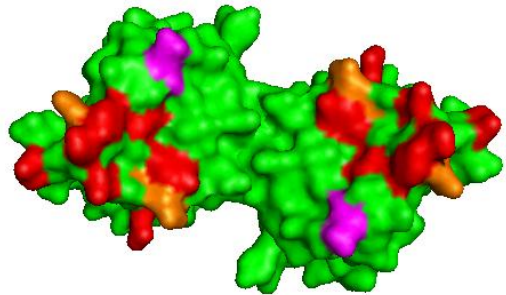

Table SI. Kinetic parameters of the interactions between LLT1 H176C and CD161 at 25°C

| Analyte                                   | Immobilized                                 | $k_{on}$<br>$\times 10^5 (M^{-1}s^{-1})$ | $k_{off}$<br>( $s^{-1}$ ) | $K_d$<br>( $\mu M$ ) | References <sup>c</sup> |
|-------------------------------------------|---------------------------------------------|------------------------------------------|---------------------------|----------------------|-------------------------|
| LLT1 H176C                                | CD161 <sup>a</sup><br>(430 RU) <sup>b</sup> | 1.1±0.1                                  | 5.3±0.55                  | 48.5±7.5             | This study              |
| <b>Other protein-protein interactions</b> |                                             |                                          |                           |                      |                         |
| E-selectin                                | ESL                                         | 0.48                                     | 2.7                       | 56                   | (1)                     |
| L-selectin                                | GlyCAM-1                                    | >1                                       | >10                       | 108                  | (2)                     |
| P-selectin                                | PSGL-1                                      | 44                                       | 1.4                       | 0.32                 | (3)                     |
| LILRB1D1D2                                | UL18                                        | 1.4                                      | 0.0028                    | 0.0021               | (4)                     |
| KIR2DL3                                   | HLA-Cw7/DS11                                | 2.1                                      | 1.1                       | 5.2                  | (5)                     |
| CD8 $\alpha\alpha$                        | MHC class I                                 | ≥1.0                                     | ≥18                       | ~200                 | (6)                     |
| CD22                                      | CD45                                        | ≥1.5                                     | ≥18                       | 117                  | (7)                     |
| CD80                                      | CTLA-4                                      | 9.4                                      | 0.43                      | 0.46                 | (8)                     |
| CD80                                      | CD28                                        | 6.6                                      | 1.6                       | 2.4                  | (8)                     |
| Fc $\gamma$ RIIa,IIb,III                  | hFc1                                        | 3.8—4.4                                  | 0.31—0.69                 | 0.72—1.9             | (9)                     |
| TCR                                       | Peptide-MHC                                 | 0.009—0.2                                | 0.01—0.1                  | 1—90                 | (10), (11)              |

<sup>a</sup>The values are means ± range of 2 experiments.

<sup>b</sup>RU, response unit(s)

<sup>c</sup>References

1. Wild, M. K., Huang, M. C., Schulze-Horsel, U., van der Merwe, P. A., and Vestweber, D. (2001) *J Biol Chem* **276**, 31602-31612
2. Nicholson, M. W., Barclay, A. N., Singer, M. S., Rosen, S. D., and van der Merwe, P. A. (1998) *J Biol Chem* **273**, 763-770
3. Mehta, P., Cummings, R. D., and McEver, R. P. (1998) *J Biol Chem* **273**, 32506-32513
4. Chapman, T. L., Heikeman, A. P., and Bjorkman, P. J. (1999) *Immunity* **11**, 603-613
5. Maenaka, K., Juji, T., Nakayama, T., Wyer, J. R., Gao, G. F., Maenaka, T., Zaccari, N. R., Kikuchi, A., Yabe, T., Tokunaga, K., Tadokoro, K., Stuart, D. I., Jones, E. Y., and van der Merwe, P. A. (1999) *J Biol Chem* **274**, 28329-28334
6. Gao, G. F., Willcox, B. E., Wyer, J. R., Boulter, J. M., O'Callaghan, C. A., Maenaka, K., Stuart, D. I., Jones, E. Y., Van Der Merwe, P. A., Bell, J. I., and Jakobsen, B. K. (2000) *J Biol Chem* **275**, 15232-15238

7. Bakker, T. R., Piperi, C., Davies, E. A., and Merwe, P. A. (2002) *Eur J Immunol* **32**, 1924-1932
8. van der Merwe, P. A., Bodian, D. L., Daenke, S., Linsley, P., and Davis, S. J. (1997) *J Exp Med* **185**, 393-403
9. Maenaka, K., van der Merwe, P. A., Stuart, D. I., Jones, E. Y., and Sonderrmann, P. (2001) *J Biol Chem* **276**, 44898-44904
10. Willcox, B. E., Gao, G. F., Wyer, J. R., Ladbury, J. E., Bell, J. I., Jakobsen, B. K., and van der Merwe, P. A. (1999) *Immunity* **10**, 357-365
11. Boniface, J. J., Reich, Z., Lyons, D. S., and Davis, M. M. (1999) *Proc Natl Acad Sci U S A* **96**, 11446-11451



Table SII. Thermodynamic parameters of the interactions at 25°C

| Analyte       | Immobilized        | $\Delta G$ | $\Delta H$<br>(kcal•mol <sup>-1</sup> ) | - T $\Delta S$ | $\Delta C_p$<br>(kcal•mol <sup>-1</sup> •K <sup>-1</sup> ) |
|---------------|--------------------|------------|-----------------------------------------|----------------|------------------------------------------------------------|
| LLT1<br>H176C | CD161 <sup>a</sup> | - 5.9±0.02 | - 3.2±0.13                              | - 2.7±0.11     | - 0.41±0.01                                                |
| TCR           | MHC                | - 7.1±0.6  | - 14.6±5.4                              | 7.1±5.7        | - 0.62±0.37                                                |
| KIR2DL3       | HLA-Cw7            | - 7.2      | - 4.1                                   | - 3.1          | - 0.1                                                      |

<sup>a</sup>The values are means ± standard error of 3 experiments.
